# Supplementary material for: Constrained azeotropic optimization of extraction system components for the safe and efficient recovery of a desired metabolite (e.g., 3-demethylated colchicine)
Source: Royal Society of Chemistry journal article supplement (doi:10.1039/c5ra26608d), 2016-01-01
Supplement: c5ra26608d1.pdf [file c5ra26608d1.pdf]

## **Annexure I**

### **ANN Weights**

#### **IW**

|                    |                    |                    |
|--------------------|--------------------|--------------------|
| -0.808385836602885 | 2.24541024112469   | 1.90654932178142   |
| 0.609091982820408  | 2.34171822561739   | 0.965362069393803  |
| 2.98984726096865   | 2.05428655451522   | -1.72960154597842  |
| -0.595788170570710 | 0.0799012621870021 | -3.20390219181210  |
| -1.95583753487404  | -2.17460293001043  | -1.59325365311263  |
| -3.50917106173062  | 0.241551762981286  | -0.461614318762941 |
| -2.01508195833517  | 0.367347436256357  | 2.52097909406800   |
| 2.21224711694103   | -0.999948898114357 | -2.07988703826076  |
| -2.21920868179033  | -2.13632503841014  | 2.09994247372763   |
| 2.07961168050576   | 0.151925522654230  | -2.35172704564944  |
| 1.04838782256622   | -1.85571847547438  | 2.25435384408603   |
| -1.93372612177476  | 2.65414090388499   | -0.174029290807205 |
| -0.745568362041493 | 1.19156356665606   | 3.00520309362287   |

#### **LW**

|                    |                     |                    |
|--------------------|---------------------|--------------------|
| -0.652325017331999 | -0.0502175356076289 | -0.661068277306957 |
| 1.21989290983133   | 0.193560828117106   | -1.39890836283379  |
| 0.163399806260426  | 0.850870026630242   | 1.09523897826336   |
| 0.107645555433050  | -0.538981037407103  | 0.275364098992689  |

#### **Bias I**

3.71119225777683  
-3.59469112578572  
-2.23422741268519  
1.43251106520335  
0.885330610576988  
-0.0914581199343325  
-0.482414846726668  
0.909787323850301  
-0.714340306804695  
2.23280049952377  
1.73279827013194  
-2.76081399507691  
-3.26914036835649

#### **Bias II**

-0.208593523639734

### **GA constrains**

#### **Equality constraints**

1. Addition should be equal to  $1 \cdot x_1 + 1 \cdot x_2 + x_1 \cdot x_3 = 200$
2. Acetone is always 70% of chloroform  $x_1 \cdot 0.7 - x_2 \cdot 1 + x_3 \cdot 0 = 0$

### Bound Constraint matrix for Matlab

[98 68.6 183]

[10 7 33.34]

### GA results

#### Optimum point

| Chloroform (mL)   | Acetone (mL)      | Ethanol (mL)      |
|-------------------|-------------------|-------------------|
| 63.05495690835494 | 44.13760376975034 | 92.80657325579655 |

Maximum Value: **6.47 mg/mL**

### The Extra Code

```
function F = snl(x);
global sann t v
y=[x(1); x(2); x(3)]
n=sann(y); # sann is the neural network
if (t<n)
    t=n; # Storing the value of maximum recovery in a global variable
    v=x(1); # Storing the value of chloroform in a global variable
    d=-n;
elseif (t>n)
    d=-n;
elseif (t==n)
    if (x(1)>=v) # rejecting any higher or equal chloroform volumes
                # resulting in same recovery
        n=n-1;
        d=-n;
    elseif (x(1)<v)
        v=x(1)
        d=-n;
    end
end
F=d;
end
```

### GAoptions = Default otherwise mentioned

PopulationType: []  
 PopInitRange: []  
 PopulationSize: 250  
 EliteCount: []  
 CrossoverFraction: []  
 ParetoFraction: []  
 MigrationDirection: []  
 MigrationInterval: []  
 MigrationFraction: []

Generations: 50  
TimeLimit: []  
FitnessLimit: []  
StallGenLimit: 10  
StallTimeLimit: []  
TolFun: []  
TolCon: []  
InitialPopulation: [100x3 double]  
InitialScores: [100x1 double]  
InitialPenalty: []  
PenaltyFactor: []  
PlotInterval: []  
CreationFcn: []  
FitnessScalingFcn: []  
SelectionFcn: []  
CrossoverFcn: @crossoverscattered  
MutationFcn: []  
DistanceMeasureFcn: []  
HybridFcn: []  
Display: 'off'  
PlotFcns: {@gaplotbestf} {@gaplotbestindiv}  
OutputFcns: []  
Vectorized: []  
UseParallel: []  
**All the [] options are at default values.**

## **Annexure II**

### **Constrained Azeotropic Optimization of Extraction System Components for Safe and Efficient Recovery of Betulinic acid**

#### **Medicinal Significance of Betulinic acid**

Betulinic acid has wonderful pharmacological activities which makes this molecule commercially important.<sup>1,2</sup> Because of its selective cytotoxicity against tumor cells and favourable therapeutic mode of action, betulinic acid is a very promising newer chemotherapeutic agent for the treatment of cancer and HIV infections.<sup>3</sup> Betulinic acid is known to have thyroid-enhancing potential by lowering thyroid-stimulating hormone levels and reducing thyroid tissue damage, thereby minimizing the symptoms of hypothyroidism

when used anaphylactically in rats.<sup>4</sup> Our group and collaborators have published several research articles regarding fermentative recovery, extraction and antimicrobial properties of betulinic acid.<sup>5,6</sup> Some very interesting modelling and optimization studies for betulinic acid production from microbial bioconversion of betulin are under publication from our group using statistical and artificial neural network techniques and the current study is the extraction part of that unpublished data. Betulin is used as a precursor for the synthesis betulinic acid via bioconversion. Betulin transformations were commonly done by many microorganisms as biocatalyst.<sup>7,8</sup> In this study, we have successfully used suitable betulin catalysing bacteria for the maximum bioconversion of betulin to betulinic acid under optimum conditions (work to be published soon). In order to test our strategy we have extracted betulinic acid from this optimized fermentation broth using different solvents or solvent systems utilizing azeotropic distillation.

**Below Mentioned Experiments Were Performed to Test the Suggested Strategy (given in the manuscript)**

***Comparison of Solvents or Solvent Systems (SS)***

The fermentation broth (50 mL) recovered from the shake flask was subjected to microfiltration by a 0.22 µm ceramic cartridge in order to remove the microbial cell debris and other undissolved material. The clear culture filtrate containing betulinic acid was then subjected to extraction (1:1 v/v) under optimum process conditions (this is our unpublished data). All the azeotropic Solvent Systems (SS) mentioned in Table 1 (below) have azeotropic composition for each component of the system. For all the non-azeotrope SS mentioned in Table 1, the components of the system were maintained in equal proportions (1:1 for binary; B and 1:1:1 for ternary; T). SS No. 0-3 are pure individual solvents. Each SS was subjected to extraction of betulinic acid from the fermentation broth.

**Table 1:** Comparison of the solvent systems (SS)

| SS No | Mix | Component 1 |         | Component 2 |         | Component 3 |         | Azeotrope (if any) |            | Betulinic acid recovery (mg/L) |
|-------|-----|-------------|---------|-------------|---------|-------------|---------|--------------------|------------|--------------------------------|
|       |     | Solvent     | BP (°C) | Solvent     | BP (°C) | Solvent     | BP (°C) | Type               | Az BP (°C) |                                |
| 0     | L   | n-Hexane    | 68.95   | -           | -       | -           | -       | Non-azeotrope      | -          | 0.33±0.02                      |
| 1     | L   | Methanol    | 64.5    | -           | -       | -           | -       | Non-               | -          | 0.28±0.03                      |

|   |   |                |       |                |       |          |      |                 |      |           |
|---|---|----------------|-------|----------------|-------|----------|------|-----------------|------|-----------|
|   |   |                |       |                |       |          |      | azeotrope       |      |           |
| 2 | L | Methyl acetate | 56.3  | -              | -     | -        | -    | Non-azeotrope   | -    | 0.25±0.03 |
| 3 | L | Ethyl acetate  | 77.1  |                |       |          |      | Non-azeotrope   |      | 0.29±0.02 |
| 4 | B | Methanol       | 64.5  | Ethyl acetate  | 77.1  |          |      | Minimum boiling | 59.1 | 0.26±0.02 |
| 5 | B | Methanol       | 64.5  | Methyl acetate | 56.3  |          |      | Minimum boiling | 53.9 | 0.24±0.02 |
| 6 | B | Methanol       | 64.5  | n-Hexane       | 68.95 |          |      | Minimum boiling | 49.5 | 0.3±0.02  |
| 7 | T | n-Hexane       | 68.95 | Ethyl acetate  | 77.1  | Methanol | 64.5 | Non-azeotrope   |      | 0.3±0.03  |
| 8 | T | n-Hexane       | 68.95 | Methyl acetate | 56.3  | Methanol | 64.5 | Minimum boiling | 45   | 0.31±0.02 |

### ***Optimization of Test Solvent System (TSS)***

Table 2 (given below) shows azeotropic Test Solvent System (TSS) for n-hexane, methanol and methyl acetate. Each TSS contained n-hexane and methanol in exact ternary azeotropic ratio while methyl acetate was maintained in excess of the ternary azeotropic ratio. Each TSS was of 200 mL only. The TSS No. 24-30 are same, this was done to minimize the degree of error. Each TSS was subjected to extraction under similar conditions. Methanol and methyl acetate present in TSS are quite miscible with water, direct extraction of betulinic acid from aqueous fermentation broth with TSS will disturb the azeotropic composition of the TSS. Since, the extraction potential of n-hexane is maximum (Table 1), betulinic acid is primarily extracted with n-hexane (volume as per Table 2, per 200 mL of the fermentation broth) that forms a upper separate immiscible organic layer (containing betulinic acid) which is then collected separately and mixed with the corresponding azeotropic ratio of methanol and excess of methyl acetate (as mentioned in Table 2) forming a complex ternary azeotrope. The extracted yield of betulinic acid (column 5, Table 2) served as targets and volume of n-hexane, methanol and methyl acetate in column No. 2-4 of Table 2 served as inputs for training, validation and testing of the ANN. All the experiments were performed in triplicate and average are reported.

**Table 2:** Azeotropic Test Solvent System (*Tr*: Training TSS; *V*: Validation TSS; *T*: Testing

| <b>TSS. No</b> | <b>n-Hexane (mL)</b> | <b>Methanol (mL)</b> | <b>Methyl Acetate (mL)</b> | <b>Observed Betulinic acid (mg/L)</b> | <b>ANN predictions (mg/L)</b> |
|----------------|----------------------|----------------------|----------------------------|---------------------------------------|-------------------------------|
| 1T             | 10.00                | 1.97                 | 188.03                     | 0.01                                  | 0.004667289                   |
| 2Tr            | 14.00                | 2.75                 | 183.25                     | 0.012                                 | 0.01318799                    |

|       |       |       |        |       |             |
|-------|-------|-------|--------|-------|-------------|
| 3 T   | 18.00 | 3.54  | 178.46 | 0.016 | 0.026453249 |
| 4V    | 22.00 | 4.33  | 173.67 | 0.019 | 0.04513708  |
| 5 Tr  | 26.00 | 5.11  | 168.89 | 0.1   | 0.06811299  |
| 6 T   | 30.00 | 5.90  | 164.10 | 0.12  | 0.092944626 |
| 7 Tr  | 34.00 | 6.68  | 159.32 | 0.13  | 0.116423938 |
| 8 Tr  | 38.00 | 7.47  | 154.53 | 0.14  | 0.138969921 |
| 9 Tr  | 42.00 | 8.26  | 149.74 | 0.16  | 0.164742468 |
| 10 Tr | 46.00 | 9.04  | 144.96 | 0.2   | 0.197697915 |
| 11 V  | 50.00 | 9.83  | 140.17 | 0.24  | 0.232812234 |
| 12 Tr | 54.00 | 10.62 | 135.38 | 0.26  | 0.263124645 |
| 13 Tr | 58.00 | 11.40 | 130.60 | 0.3   | 0.296930501 |
| 14T   | 62.00 | 12.19 | 125.81 | 0.32  | 0.344865305 |
| 15 Tr | 66.00 | 12.98 | 121.02 | 0.33  | 0.334616267 |
| 16 V  | 70.00 | 13.76 | 116.24 | 0.34  | 0.344672599 |
| 17 Tr | 74.00 | 14.55 | 111.45 | 0.3   | 0.311881779 |
| 18 V  | 78.00 | 15.33 | 106.67 | 0.29  | 0.29163476  |
| 19 Tr | 82.00 | 16.12 | 101.88 | 0.3   | 0.293882356 |
| 20 Tr | 86.00 | 16.91 | 97.09  | 0.3   | 0.299280479 |
| 21 Tr | 90.00 | 17.69 | 92.31  | 0.31  | 0.302846552 |
| 22 Tr | 94.00 | 18.48 | 87.52  | 0.3   | 0.304694874 |
| 23 T  | 98.00 | 19.27 | 82.73  | 0.3   | 0.305527758 |
| 24 Tr | 54.00 | 10.62 | 135.38 | 0.26  | 0.263124645 |
| 25 T  | 54.00 | 10.62 | 135.38 | 0.28  | 0.263124645 |
| 26 V  | 54.00 | 10.62 | 135.38 | 0.29  | 0.263124645 |
| 27 Tr | 54.00 | 10.62 | 135.38 | 0.26  | 0.263124645 |
| 28 Tr | 54.00 | 10.62 | 135.38 | 0.24  | 0.263124645 |
| 29 T  | 54.00 | 10.62 | 135.38 | 0.25  | 0.263124645 |
| 30 Tr | 54.00 | 10.62 | 135.38 | 0.25  | 0.263124645 |

### ***Quantification of Betulinic acid***

In order to quantify betulinic acid, all of the residual methyl acetate was evaporated in a rotavapor at temperatures above 60°C. The collected residue was redissolved in methanol and filtered through 0.22 µm millipore filter, then analysed by RP-HPLC (YL9112, South Korea). The HPLC system used for this study consists of Yong Ling's 9112 pump, YL9120UV-Vis detector, ProntoSil C18 HQ105 H column (250 mm x 4.6 mm x 5 mm,). Samples were analysed under following condition: the flow rate was set at 1.0 ml/min under room temperature, mobile phase was composed of acetonitrile-water 91:09 (v: v). The wavelength was set at 210 nm.<sup>9,10</sup> To generate the calibration curve, betulin and betulinic acid were dissolved in dichloromethane diluted to various concentrations (25-100 µg and 10-50 µg/ml, respectively), and kept at 4°C in dark. Before the analysis, the solutions were filtered

with 0.22  $\mu\text{m}$  Millipore filter and analyzed by HPLC (YL9112, South Korea). The calibration curve was constructed by plotting the peak area versus the ratio of their corresponding concentrations. The calibration curve showed good linearity between the peak area ratios against the concentration over the calibration ranges.

#### ***Artificial Neural Network Design and Training***

Same as discussed in the manuscript (Kindly refer the manuscript).

#### ***Genetic Algorithm Based Optimization***

Same as discussed in the manuscript (Kindly refer the manuscript).

### **Results**

The extraction efficiency of each SS mentioned in Table 1 was revealed by its betulinic acid recovery. None of the SS appears to be better than pure n-hexane (SS No. 0). Hexane and methanol belongs to the restricted class 2 (as per the ICH guidelines). Solvents under class 3 (methyl acetate, acetone, ethanol etc.) are considered as less toxic and of lesser risk to human health. The ICH class 3 contains no solvent identified as a human health hazard at levels normally accepted in pharmaceutical preparations. Since, n-hexane was found to be the most suitable solvent for the extraction of betulinic acid, our objective was to determine the optimum volume of n-hexane for the extraction of betulinic acid and to finally obtain betulinic acid in a class 3 solvent in an energy efficient manner. This is achieved by making several combinations of a ternary azeotrope of hexane with methanol and methyl acetate. Each row of Table 2 forms a ternary azeotrope wherein all the n-hexane and methanol are in exact azeotropic ratio and methyl acetate is in excess. This solvent system carrying excess of entrainer (methyl acetate) when reaches the Az BP; during the downstream process (concentrating betulinic acid by evaporating the solvent at higher temperatures) all the n-hexane and methanol (both ICH restricted class 2 solvents) along with little methyl acetate (as per ternary azeotropic volumetric ratio) will distil out safely leaving excess of pure methyl acetate (ICH class 3 safe solvent) as residue. Since the residue contains only pure methyl acetate ( $\geq 99.5\%$ ) we can safely maintain betulinic acid at desired concentration levels (in methyl acetate). This method of downstream processing is quite energy efficient since the boiling point of the ternary azeotrope considered in this study ( $45^\circ\text{C}$ ) is well below the boiling point of any of the individual solvents (Table 1). Hence, lesser energy will be required to safely distil out class 2 solvent (i.e., n-hexane and methanol).

Optimization of the solvent system and the application of constraints were done in the same manner as discussed in the principal manuscript. However, the components of the Test Solvent System were kept within the following respective range.

| <b>Component</b>      | <b>Lower Bound (mL)</b> | <b>Higher Bound (mL)</b> |
|-----------------------|-------------------------|--------------------------|
| <i>n-Hexane</i>       | 10                      | 98                       |
| <i>Methanol</i>       | 1.9                     | 20                       |
| <i>Methyl acetate</i> | 82                      | 189                      |

The trained and validated feed-forward backprop network with ten hidden layers is shown in Figure 1. The performance of the network is shown in Figure 2. Regression coefficients for Training (Tr), Testing (T) and Validation (V) lie very close to 1 defining an adequately trained and validated network.

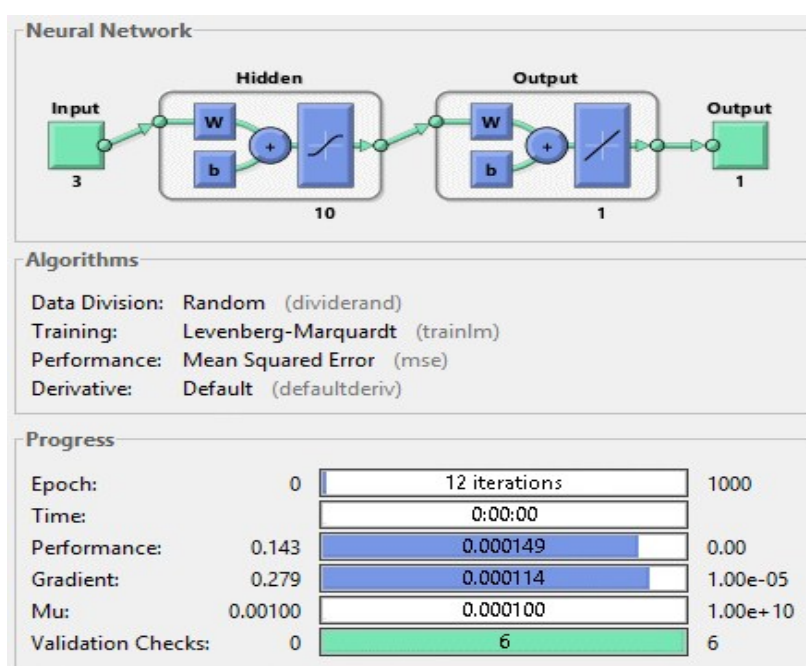

**Figure 1:** Trained and validated Artificial Neural Network



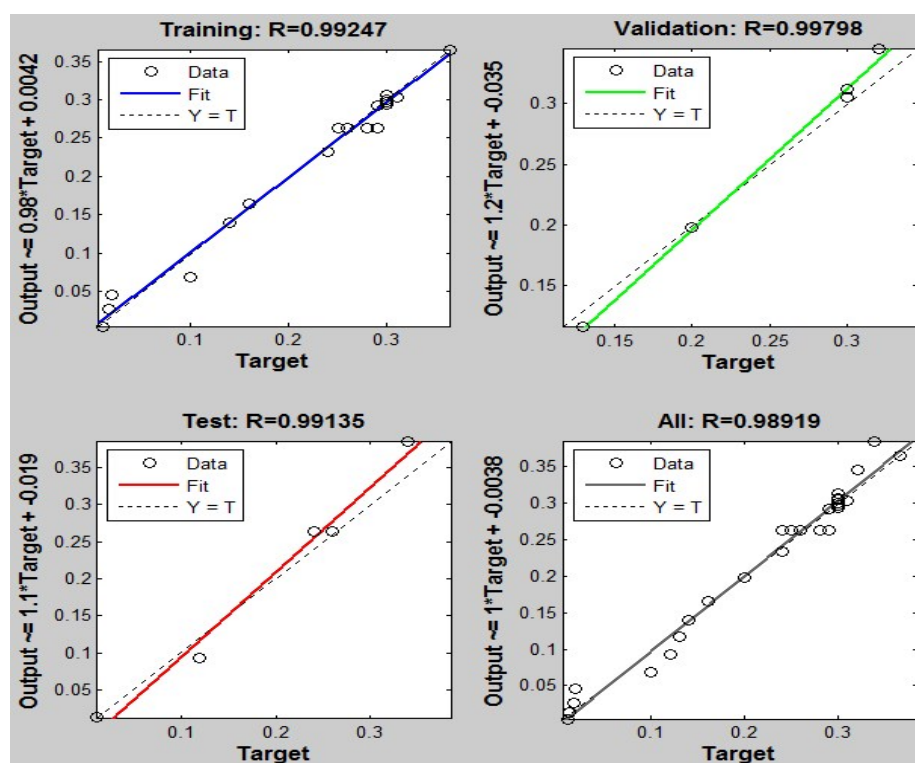

**Figure 2:** Training, Testing and validation Regression coefficients

Genetic algorithm (GA) optimization of the neural network was done in the same manner as mentioned in the manuscript. The constraints were applied using equality matrices and bounds. The optimum combination of the solvents resulting in maximum betulinic acid recovery is shown in Table 3 and Figure 3.

**Table 3.** Betulinic acid recovery in different solvents

|                         | n-Hexane         | Methanol          | Methyl acetate    | Maximum Betulinic acid recovery (mg/L) |
|-------------------------|------------------|-------------------|-------------------|----------------------------------------|
| GA prediction           | 66.9064240635182 | 13.15480095145560 | 119.9396634219262 | 0.386                                  |
| Experimentally Observed | 66.9             | 13.15             | 119.93            | 0.4±0.02                               |

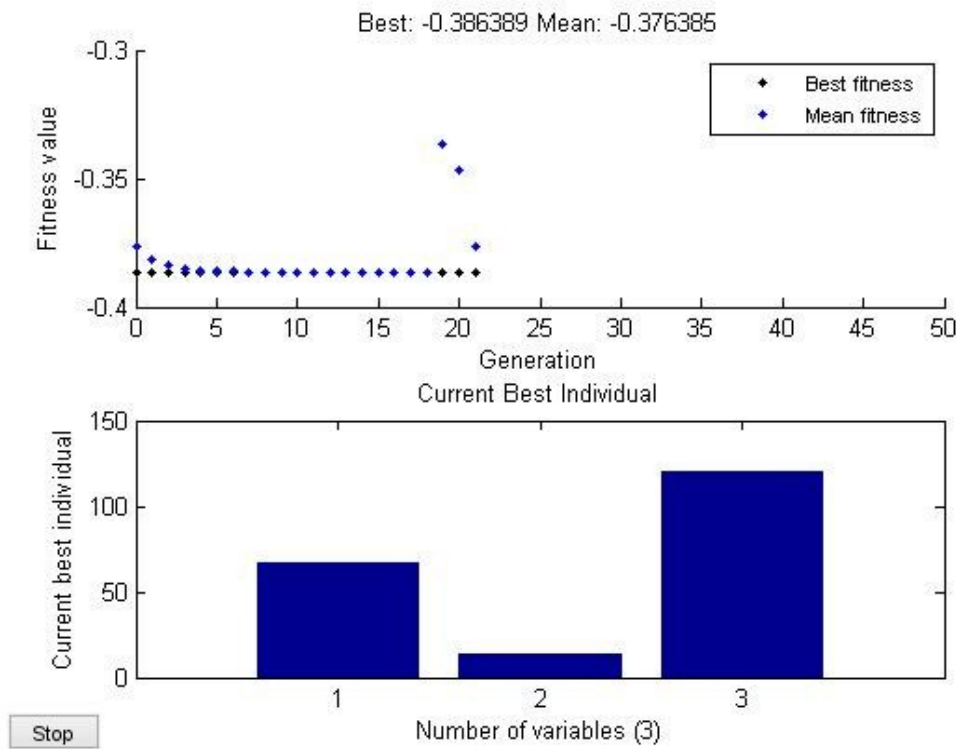

**Figure 3:** Genetic algorithm optimization

If the optimum volumetric azeotropic combination of n-hexane, methanol and methyl acetate is known, one can easily calculate the critical n-hexane free residual volume ( $V_{hr}$ ) from the volumetric azeotropic ratio of n-hexane, methanol and methyl acetate in an azeotropic ternary complex. For safety and indemnity achieving the residual volume  $\leq 70\%$  of the calculated  $V_{hr}$  assures  $\sim 100\%$  n-hexane and methanol free recovery ( $V_{hfr}$ : *Hexane and methanol free residual volume*) of the metabolite; in this case, i.e., betulinic acid:

$$V_{hr} = 200 - \text{Hexane optimum volume (mL)} - \text{methanol optimum volume (mL)} \quad (1)$$

$$V_m = 0.3218 \text{ hexane optimum volume (mL)} \quad (2)$$

$$V_{hfr} = 0.7V_{hr}$$

In this case,  $V_{hfr} = 68.89 \text{ mL}$ .

Finally reducing the volume of solvent system to 68.89 mL ensures complete n-hexane and methanol free recovery of betulinic acid. The residual volume  $V_{hfr}$  was subjected to GC/MS

analysis (TSQ 8000 Evo Triple Quadrupole GC-MS/MS; Thermofisher Scientific Inc.) for the determination of hexane and methanol. A negligible level of hexane and methanol was observed in the final free residual volume  $V_{hfr}$  (well below the prescribed ICH threshold).

## References

1. S. Alakurtti, T. Mäkelä, S. Koskimies, J. Yli-Kauhaluoma, *Eur. J. Pharm. Sci.* 2006, **29**, 1-13.
2. P. Yogeewari, D. Sriram, *Current Medicinal Chemistry* 2005, **12**, 657-666.
3. C. Aiken, C.H. Chen, *Trends in Molecular Medicine* 2005, **11**, 31-36.
4. M. Afzal, I. Kazmi, S. Semwal, F.A. Al-Abbasi, F. Anwar, *Mol. Cell Biochem.* 2014, **386**, 27-34.
5. K.K. Dubey, N. Goel, *The Scientific World Journal* 2013 (2013). Volume 2013 (2013), Article ID 469674, 9 pages. <http://dx.doi.org/10.1155/2013/469674>
6. S. Haque, D.A. Nawrot, S. Alakurtti, L. Ghentio, J. Yli-Kauhaluoma, P. Tammela, *PloS One* 9, no. 7 (2014): e102696.
7. D.B. Mao, Y.Q. Feng, Y.H. Bai, *J. of the Taiwan Instt. Chem. Engg.* 2012, **43**, 825-829.
8. Y. Feng, M. Li, J. Liu, *Food Chemistry* 2013, **136**, 73-79.
9. Q.H. Chen, J. Liu, H.F. Zhang, G.Q. He, M.L. Fu, *Enzyme Microb. Technol.* 2009, **45**, 175-180.
10. Y.H. Zhang, T. Yu, Y. Wang, *J. For. Res.* 2003, **14**, 202-204.
